# Supplementary material
Source: PubMed Central journal article supplement (PMC10935603)
Supplement: NIHMS1967613-supplement-Supplemental_Table_1.pdf [file NIHMS1967613-supplement-Supplemental_Table_1.pdf]

Supplemental Table 1: Literature Review Findings on Classroom Management Skills Empirically Associated with School Connectedness Outcomes in K-12 School Settings

| Citation             | Grade Level(s) | Student Sample                                                                                                                                                                                                                                                                        | Teacher Sample                                                                               | Classroom Management Skill(s) | School Connectedness Effects                                                                                               | Null Effects     |
|----------------------|----------------|---------------------------------------------------------------------------------------------------------------------------------------------------------------------------------------------------------------------------------------------------------------------------------------|----------------------------------------------------------------------------------------------|-------------------------------|----------------------------------------------------------------------------------------------------------------------------|------------------|
| Acosta et al., 2019  | 6-7            | N= 2,834<br>Mean Age: NR <sup>a</sup><br>Sex: 49% female<br>Race/Ethnicity: 2% African American, 7% American Indian/Alaska Native, 2% Asian, 3% Hispanic/Latino, 1% Native Hawaiian or Other Pacific Islander, 8% Other, 86% White<br>Students Qualifying for Free/Reduced Lunch: 48% | N= NR<br>Mean Age: NR<br>Sex: NR<br>Race/Ethnicity: NR<br>Mean Years Teaching Experience: NR | Clarity and Consistency       | Direct: School connectedness (positive); Peer attachment (positive)<br>Interaction: None                                   | None             |
|                      |                |                                                                                                                                                                                                                                                                                       |                                                                                              | Teacher Support               | Direct: School connectedness (positive); Peer attachment (positive)<br>Interaction: none                                   | None             |
|                      |                |                                                                                                                                                                                                                                                                                       |                                                                                              | Positive Peer Interactions    | Direct: School connectedness (positive); Peer attachment (positive)<br>Interaction: none                                   | None             |
|                      |                |                                                                                                                                                                                                                                                                                       |                                                                                              | Student Input                 | Direct: School connectedness (positive); Peer attachment (positive)<br>Interaction: none                                   | None             |
| Baroody et al., 2014 | 5              | N= 387<br>Mean Age: NR<br>Sex: NR<br>Race/Ethnicity: 41% White                                                                                                                                                                                                                        | N= 63<br>Mean Age: NR<br>Sex: 91% female<br>Race/Ethnicity: 76% White                        | Morning Meeting               | Direct: Teacher closeness (positive)<br>Interaction: Responsive Classroom training * Morning Meeting and Teacher closeness | Teacher conflict |

| Citation             | Grade Level(s) | Student Sample                                                                                                                                                                                                                                 | Teacher Sample                                                                               | Classroom Management Skill(s) | School Connectedness Effects                                                                                                                                                                                                                                                                                                                                                                                                                                            | Null Effects                        |
|----------------------|----------------|------------------------------------------------------------------------------------------------------------------------------------------------------------------------------------------------------------------------------------------------|----------------------------------------------------------------------------------------------|-------------------------------|-------------------------------------------------------------------------------------------------------------------------------------------------------------------------------------------------------------------------------------------------------------------------------------------------------------------------------------------------------------------------------------------------------------------------------------------------------------------------|-------------------------------------|
|                      |                | Students Qualifying for Free/Reduced Lunch: 21%                                                                                                                                                                                                | Mean Years Teaching Experience: 12.5                                                         |                               |                                                                                                                                                                                                                                                                                                                                                                                                                                                                         |                                     |
|                      |                |                                                                                                                                                                                                                                                |                                                                                              | Academic Choice               | Direct: None<br>Interaction: None                                                                                                                                                                                                                                                                                                                                                                                                                                       | Teacher closeness; Teacher conflict |
|                      |                |                                                                                                                                                                                                                                                |                                                                                              | Interactive Modelling         | Direct: None<br>Interaction: None                                                                                                                                                                                                                                                                                                                                                                                                                                       | Teacher closeness; Teacher conflict |
|                      |                |                                                                                                                                                                                                                                                |                                                                                              | Rule Creation                 | Direct: None<br>Interaction: None                                                                                                                                                                                                                                                                                                                                                                                                                                       | Teacher closeness; Teacher conflict |
| Buehler et al., 2015 | 6              | N= 390<br>Mean Age: NR<br>Sex: 55.9% female<br>Race/Ethnicity: 50.8% African American, 2.6% Asian (not Hmong), 13.1% Hispanic, 0.3% Hmong/Southeast Asian, 0.8% Native American, 31.2% White<br>Students Qualifying for Free/Reduced Lunch: NR | N= NR<br>Mean Age: NR<br>Sex: NR<br>Race/Ethnicity: NR<br>Mean Years Teaching Experience: NR | Teacher Support               | Direct: School satisfaction (positive); School engagement (positive)<br>Interaction: Teacher support * Grades and School satisfaction; Teacher support * Gender and School satisfaction; Teacher support * Black/Hispanic and School satisfaction; Teacher support * Black/Non-Hispanic White and School satisfaction; Teacher support * Ethnicity and School satisfaction; Teacher support * Grades and School engagement; Teacher support * Black/Hispanic and School | None                                |

| Citation            | Grade Level(s) | Student Sample                                                                                                                                                                                                           | Teacher Sample                                                                                                                                                                   | Classroom Management Skill(s)                   | School Connectedness Effects                                                   | Null Effects                                         |
|---------------------|----------------|--------------------------------------------------------------------------------------------------------------------------------------------------------------------------------------------------------------------------|----------------------------------------------------------------------------------------------------------------------------------------------------------------------------------|-------------------------------------------------|--------------------------------------------------------------------------------|------------------------------------------------------|
|                     |                |                                                                                                                                                                                                                          |                                                                                                                                                                                  |                                                 | engagement; Teacher support *<br>Ethnicity and School engagement               |                                                      |
| Doumas et al., 2019 | 3-6            | N= 110<br>Mean Age: 9.76 yrs<br>Sex: 59.1% female<br>Race/Ethnicity: 9.1% African American, 6.4% Asian, 9.1% Hispanic, 0.9% Pacific Islander, 11.8% Other, 62.7% White<br>Students Qualifying for Free/Reduced Lunch: NR | N= NR<br>Mean Age: NR<br>Sex: NR<br>Race/Ethnicity: NR<br>Mean Years Teaching Experience: NR                                                                                     | Perceived Teacher Anti-Bullying Behavior        | Direct: Sense of school belonging (positive)<br>Interaction: None              | None                                                 |
| Duong et al., 2019  | Middle School  | N= 190<br>Mean Age: NR<br>Sex: NR<br>Race/Ethnicity: 1.6% African American, 21.1% Asian, 20% Hispanic/Latino, 3.7% Other, 53.7% White<br>Students Qualifying for Free/Reduced Lunch: 50%                                 | N= 20<br>Mean Age: 32.7 yrs<br>Sex: 90% female<br>Race/Ethnicity: 5% African American, 10% Asian, 5% Hispanic/Latino, 5% Other, 75% White<br>Mean Years Teaching Experience: 8.7 | Training in Establish-Maintain-Restore Approach | Direct: Positive student-teacher relationships (positive)<br>Interaction: None | None                                                 |
| Gest et al., 2014   | 1, 3, 5        | N= 1,063<br>Mean Age: NR<br>Sex: NR<br>Race/Ethnicity: 47% African American, 15% Hispanic, 28% White<br>Students Qualifying for Free/Reduced Lunch: 44%                                                                  | N= 54<br>Mean age: 41 years<br>Sex: 91% female<br>Race/Ethnicity: NR<br>Mean Years Teaching Experience: 15                                                                       | Popularity Attunement                           | Direct: none<br>Interaction: none                                              | Sense of peer community;<br>Students' school bonding |

| Citation | Grade Level(s) | Student Sample | Teacher Sample | Classroom Management Skill(s) | School Connectedness Effects                                                                                   | Null Effects                                          |
|----------|----------------|----------------|----------------|-------------------------------|----------------------------------------------------------------------------------------------------------------|-------------------------------------------------------|
|          |                |                |                | Mitigating Status Extremes    | Direct: none<br>Interaction: Mitigating status extremes * Time and Students' sense of peer community           | Students' school bonding                              |
|          |                |                |                | Friendship Attunement         | Direct: none<br>Interaction: Responsive teaching * Friendship attunement and Students' school bonding          | Students' school bonding                              |
|          |                |                |                | Supporting Isolated Children  | Direct: none<br>Interaction: Supporting isolated children * Time and Students' sense of peer community         | Students' school bonding                              |
|          |                |                |                | Aggression Attunement         | Direct: none<br>Interaction: None                                                                              | Sense of peer connectedness; Students' school bonding |
|          |                |                |                | Victimization Attunement      | Direct: none<br>Interaction: Responsive teaching * Victimization attunement * Time and Students school bonding | Sense of peer connectedness                           |
|          |                |                |                | Managing Aggression           | Direct: none<br>Interaction: None                                                                              | Sense of peer connectedness; Students' school bonding |
|          |                |                |                | Promoting Prosocial Behavior  | Direct: none<br>Interaction: Responsive teaching * Promoting prosocial behavior * Time                         | Students' school bonding                              |

| Citation             | Grade Level(s) | Student Sample                                                                                                                                                                                   | Teacher Sample                                                                                                                           | Classroom Management Skill(s)             | School Connectedness Effects<br>and Students' sense of peer community                                        | Null Effects                          |
|----------------------|----------------|--------------------------------------------------------------------------------------------------------------------------------------------------------------------------------------------------|------------------------------------------------------------------------------------------------------------------------------------------|-------------------------------------------|--------------------------------------------------------------------------------------------------------------|---------------------------------------|
| Giles et al., 2012   | 7              | N= 2,240<br>Mean Age: 12.5 yrs<br>Sex: NR<br>Race/Ethnicity: 56.7% African American, 26.9% Hispanic<br>Students Qualifying for Free/Reduced Lunch: NR                                            | N= 48<br>Mean Age: NR<br>Sex: 79.2% female<br>Race/Ethnicity: 47.9% African American, 41.7% White<br>Mean Years Teaching Experience: 9.7 | Teacher Expressive Communication Style    | Direct: None<br>Interaction: None                                                                            | Positive student-teacher relationship |
|                      |                |                                                                                                                                                                                                  |                                                                                                                                          | Teacher Authoritarian Communication Style | Direct: Positive student-teacher relationship (negative)<br>Interaction: None                                | None                                  |
| Hafen et al., 2012   | 9-12           | N= 578<br>Mean Age: NR<br>Sex: NR<br>Race/Ethnicity: 25.2% African American, 1.2% Asian, 5.1% Hispanic, 67.8% White<br>Students Qualifying for Free/Reduced Lunch: NR                            | N= 34<br>Mean Age: NR<br>Sex: 52.9% female<br>Race/Ethnicity: NR<br>Mean Years Teaching Experience: 7.5                                  | Adolescent Autonomy                       | Direct: Behavioral engagement (positive)<br>Interaction: None                                                | None                                  |
| Kearney et al., 2014 | 4, 5           | N= 2,340<br>Mean Age: NR<br>Sex: NR<br>Race/Ethnicity: 2.7% African American, 1.5% Asian, 30.5% Hispanic, .04% Native American, 64.9% White<br>Students Qualifying for Free/Reduced Lunch: 8-71% | N= NR<br>Mean Age: NR<br>Sex: NR<br>Race/Ethnicity: NR<br>Mean Years Teaching Experience: NR                                             | Supportive Teacher Behavior               | Direct: Student engagement in math (positive); Student engagement in reading (positive)<br>Interaction: None | None                                  |

| Citation            | Grade Level(s) | Student Sample                                                                                                                                                                                      | Teacher Sample                                                                               | Classroom Management Skill(s)       | School Connectedness Effects                                                                                                                          | Null Effects                                   |
|---------------------|----------------|-----------------------------------------------------------------------------------------------------------------------------------------------------------------------------------------------------|----------------------------------------------------------------------------------------------|-------------------------------------|-------------------------------------------------------------------------------------------------------------------------------------------------------|------------------------------------------------|
|                     |                |                                                                                                                                                                                                     |                                                                                              | Student Collegial Support           | Direct: Student engagement in math (positive); Student engagement in reading (positive)<br>Interaction: None                                          | None                                           |
| Kiefer et al., 2017 | 6-8            | N= 209<br>Mean Age: NR<br>Sex: 61% female<br>Race/Ethnicity: 6% African American, 6% Asian American, 39% Latino, 13% Multiracial/Other, 36% White<br>Students Qualifying for Free/Reduced Lunch: NR | N= NR<br>Mean Age: NR<br>Sex: NR<br>Race/Ethnicity: NR<br>Mean Years Teaching Experience: NR | Teacher Autonomy Support- Choice    | Direct: None<br>Interaction: None                                                                                                                     | School belonging; Involved behavior/engagement |
|                     |                |                                                                                                                                                                                                     |                                                                                              | Teacher Autonomy Support- Respect   | Direct: School belonging (positive); Involved behavior/engagement<br>Interaction: None                                                                | None                                           |
|                     |                |                                                                                                                                                                                                     |                                                                                              | Teacher Autonomy Support- Relevance | Direct: None<br>Interaction: Relevance * Expectation and Involved behavior/engagement                                                                 | School belonging; Involved behavior/engagement |
|                     |                |                                                                                                                                                                                                     |                                                                                              | Teacher Structure-Monitoring        | Direct: None<br>Interaction: Respect * Monitoring and School belonging                                                                                | School belonging; Involved behavior/engagement |
|                     |                |                                                                                                                                                                                                     |                                                                                              | Teacher Structure-Expectations      | Direct: School belonging (positive); Involved behavior/engagement (positive)<br>Interaction: Relevance * Expectation and Involved behavior/engagement | None                                           |
|                     |                |                                                                                                                                                                                                     |                                                                                              | Teacher Structure-Help              | Direct: None<br>Interaction: None                                                                                                                     | School belonging; Involved behavior/engagement |
| Kim et al., 2016    | K-5            | N= 111<br>Mean Age: 7.91                                                                                                                                                                            | N= 31<br>Mean Age: NR                                                                        | Peer Connection                     | Direct: None                                                                                                                                          | Behavioral engagement                          |

| Citation         | Grade Level(s) | Student Sample                                                                                                                                                     | Teacher Sample                                                                                                                    | Classroom Management Skill(s) | School Connectedness Effects                                                                                                           | Null Effects          |
|------------------|----------------|--------------------------------------------------------------------------------------------------------------------------------------------------------------------|-----------------------------------------------------------------------------------------------------------------------------------|-------------------------------|----------------------------------------------------------------------------------------------------------------------------------------|-----------------------|
|                  |                | Sex: 42% female<br>Race/Ethnicity (teacher report):<br>3% African American, 95% Latino, 2% Mixed Race/Other<br>Students Qualifying for Free/Reduced Lunch: 99%     | Sex: 81% female<br>Race/Ethnicity: 7% African American; 53% Latino, 3% Other, 37% White<br>Mean Years Working in the School: 7.42 |                               | Interaction: Peer connection * Grade level and Behavioral engagement;<br>Classroom quality * Peer connection and Behavioral engagement |                       |
|                  |                |                                                                                                                                                                    |                                                                                                                                   | Teacher-Student Closeness     | Direct: None<br>Interaction: None                                                                                                      | Behavioral engagement |
|                  |                |                                                                                                                                                                    |                                                                                                                                   | Teacher-Student Conflict      | Direct: Behavioral engagement (negative)<br>Interaction: Teacher-student conflict * Classroom quality and Behavioral engagement        | None                  |
| Lee et al., 2012 | 9, 10          | N= 3,748<br>Mean Age: 15 yrs<br>Sex: NR<br>Race/Ethnicity: NR<br>Students Qualifying for Free/Reduced Lunch: NR                                                    | N= NR<br>Mean Age: NR<br>Sex: NR<br>Race/Ethnicity: NR<br>Mean Years Teaching Experience: NR                                      | Teacher-Student Relationship  | Direct: Behavioral engagement (positive); Emotional engagement<br>Interaction: None                                                    | None                  |
| Lee et al., 2015 | K              | N= 164<br>Mean Age: 4.49 yrs<br>Sex: 56% female<br>Race/Ethnicity: 30% African American, 14% Hispanic, 56% White<br>Students Qualifying for Free/Reduced Lunch: NR | N= NR<br>Mean Age: NR<br>Sex: NR<br>Race/Ethnicity: NR<br>Mean Years Teaching Experience: NR                                      | Student-Teacher Closeness     | Direct: Learning engagement (positive)<br>Interaction: None                                                                            | None                  |

| Citation           | Grade Level(s) | Student Sample                                                                                                                                                                         | Teacher Sample                                                                                                                                               | Classroom Management Skill(s) | School Connectedness Effects                                                                 | Null Effects |
|--------------------|----------------|----------------------------------------------------------------------------------------------------------------------------------------------------------------------------------------|--------------------------------------------------------------------------------------------------------------------------------------------------------------|-------------------------------|----------------------------------------------------------------------------------------------|--------------|
| Ruzek et al., 2016 | Middle School  | N= 960<br>Mean Age: NR<br>Sex: NR<br>Race/Ethnicity: 29.4% African American, 7.4% Asian American/Hispanic/Mixed race, 63.2% White<br>Students Qualifying for Free/Reduced Lunch: 34.8% | N= 68<br>Mean Age: NR<br>Sex: 64% female<br>Race/Ethnicity: % African American, 6% Mixed ethnicity, 3% Other, 84% White<br>Mean Years Teaching Experience: 8 | Autonomy                      | Direct: Behavioral engagement (positive); Mastery motivation (positive)<br>Interaction: None | None         |
|                    |                |                                                                                                                                                                                        |                                                                                                                                                              | Relatedness                   | Direct: Behavioral engagement (positive); Mastery motivation (positive)<br>Interaction: None | None         |

<sup>a</sup>NR= Not reported
